# Supplementary material
Source: PubMed Central journal article supplement (PMC8626365)
Supplement: 40264_2021_1121_MOESM1_ESM.pdf [file 40264_2021_1121_MOESM1_ESM.pdf]

## **Electronic Supplementary Material**

**Manuscript Title:** Safety Profile of GSK's Inactivated Quadrivalent Seasonal Influenza Vaccine in Belgium, Germany and Spain: Passive Enhanced Safety Surveillance Study for the 2019/2020 Influenza Season

**Journal:** Drug Safety

**Authors:** Ignacio Salamanca de la Cueva<sup>1</sup> Elisa Cinconze<sup>2</sup> Tamara Eckermann<sup>3</sup> Ugo Nwoji<sup>4</sup> Lode Godderis<sup>5,6</sup> Emily Lu<sup>4</sup> Xavier Martínez-Gómez<sup>7</sup> Huajun Wang<sup>8</sup> Emad Yanni<sup>4</sup>

### **Affiliations:**

<sup>1</sup> Instituto Hispalense de Pediatría, Sevilla, Spain

<sup>2</sup> GSK, Siena, Italy

<sup>3</sup> Hausarztpraxis Heimeranplatz, Munich, Germany

<sup>4</sup> GSK, Rockville, MD, USA

<sup>5</sup> Environment and Health, Department of Public Health and Primary Care, KU Leuven, Louvain, Belgium

<sup>6</sup> IDEWE, External Service for Prevention and Protection at Work, Heverlee, Belgium

<sup>7</sup> Hospital Universitari Vall d'Hebron, Barcelona, Spain

<sup>8</sup> GSK, Amsterdam, The Netherlands

### **Corresponding Author:**

Emad Yanni

Mailing address: GSK, Rockville, MD, USA

Phone: +1 215 751 3088

Email address: [emad.a.yanni@gsk.com](mailto:emad.a.yanni@gsk.com)

**Table S1 Weekly percentages of participants reporting any AEs within 7 days post vaccination from week 40 of 2019 to week 01 in 2020 (Safety Set)**

| ISO<br>week | Weekly, after dose 1 |          |                   | Weekly, after dose 2 |          |                   |
|-------------|----------------------|----------|-------------------|----------------------|----------|-------------------|
|             | <i>N</i>             | <i>n</i> | % (95% CI: LL–UL) | <i>N</i>             | <i>n</i> | % (95% CI: LL–UL) |
| 40          | 65                   | 13       | 20.0 (0.0–97.6)   |                      |          |                   |
| 41          | 150                  | 55       | 36.7 (1.2–91.9)   |                      |          |                   |
| 42          | 169                  | 79       | 46.8 (16.5–79.0)  |                      |          |                   |
| 43          | 34                   | 11       | 32.4 (8.2–66.7)   |                      |          |                   |
| 44          | 67                   | 35       | 52.2 (0.0–100)    |                      |          |                   |
| 45          | 163                  | 61       | 37.4 (21.2–56.0)  |                      |          |                   |
| 46          | 251                  | 96       | 38.3 (30.1–46.9)  |                      |          |                   |
| 47          | 143                  | 60       | 42.0 (20.7–65.7)  |                      |          |                   |
| 48          | 30                   | 11       | 36.7 (16.5–61.0)  | 4                    | 1        | 25.0 (0.6–80.6)   |
| 49          | 10                   | 3        | 30.0 (0.0–100)    | 20                   | 3        | 15.0 (3.2–37.9)   |
| 50          |                      |          |                   | 22                   | 2        | 9.1 (1.1–29.2)    |
| 51          |                      |          |                   | 30                   | 0        | 0.0 (0.0–11.6)    |
| 52          |                      |          |                   | 25                   | 3        | 12.0 (2.6–31.2)   |
| 01*         |                      |          |                   | 14                   | 0        | 0.0 (0.0–23.2)    |

AE, adverse event; CI, confidence interval (extended Clopper–Pearson exact CI for clustered data); ISO, International Organization for Standardization; LL, lower limit; *N*, number of participants vaccinated with GSK's inactivated quadrivalent seasonal influenza vaccine (IIV4) in the specified ISO weeks; *n*, number of participants vaccinated with GSK's IIV4 in the specified ISO weeks reporting at least one AE; UL, upper limit; % = (*n*/*N*) x 100

\* first ISO week of 2020

**Table S2 Number of AEs reported within 7 days post vaccination per participant (Safety Set)**

| Number of AEs<br>per participant | After dose 1<br><i>N</i> = 1,082 |      | After dose 2<br><i>N</i> = 115 |      |
|----------------------------------|----------------------------------|------|--------------------------------|------|
|                                  | <i>n</i>                         | %    | <i>n</i>                       | %    |
| 0                                | 658                              | 60.8 | 106                            | 92.2 |
| 1                                | 167                              | 15.4 | 4                              | 3.5  |
| 2                                | 96                               | 8.9  | 1                              | 0.9  |
| 3                                | 77                               | 7.1  | 2                              | 1.7  |
| 4                                | 43                               | 4.0  | 2                              | 1.7  |
| 5                                | 21                               | 1.9  | 0                              | 0.0  |
| 6                                | 5                                | 0.5  | 0                              | 0.0  |
| 7                                | 10                               | 0.9  | 0                              | 0.0  |
| 8                                | 1                                | 0.1  | 0                              | 0.0  |
| 9                                | 1                                | 0.1  | 0                              | 0.0  |
| 10                               | 2                                | 0.2  | 0                              | 0.0  |
| 11                               | 0                                | 0.0  | 0                              | 0.0  |
| 12                               | 1                                | 0.1  | 0                              | 0.0  |
| <b>mean</b>                      | 0.9                              |      | 0.2                            |      |

AE, adverse event; *N*, total number of participants; *n*, %, number and percentage of participants reporting the specific number of AEs

**Table S3 Cumulative percentages of participants reporting any AEs within 7 days post vaccination with dose 1 (Safety Set)**

| ISO week | Belgium  |          |                   | Germany  |          |                   | Spain    |          |                   | Total    |          |                   |
|----------|----------|----------|-------------------|----------|----------|-------------------|----------|----------|-------------------|----------|----------|-------------------|
|          | <i>N</i> | <i>n</i> | % (95% CI: LL–UL) | <i>N</i> | <i>n</i> | % (95% CI: LL–UL) | <i>N</i> | <i>n</i> | % (95% CI: LL–UL) | <i>N</i> | <i>n</i> | % (95% CI: LL–UL) |
| 40–40    | 0        |          |                   | 65       | 13       | 20.0 (0.0–97.6)   | 0        |          |                   | 65       | 13       | 20.0 (0.0–97.6)   |
| 40–41    | 0        |          |                   | 215      | 68       | 31.6 (1.6–84.5)   | 0        |          |                   | 215      | 68       | 31.6 (1.6–84.5)   |
| 40–42    | 113      | 61       | 54.0 (44.4–63.4)  | 271      | 86       | 31.7 (2.1–82.6)   | 0        |          |                   | 384      | 147      | 38.3 (13.2–69.1)  |
| 40–43    | 131      | 68       | 51.9 (41.5–62.2)  | 287      | 90       | 31.4 (2.8–79.1)   | 0        |          |                   | 418      | 158      | 37.8 (17.6–61.7)  |
| 40–44    | 142      | 77       | 54.2 (11.3–92.7)  | 287      | 90       | 31.4 (2.8–79.1)   | 56       | 26       | 46.4 (33.0–60.3)  | 485      | 193      | 39.8 (23.6–57.8)  |
| 40–45    | 220      | 109      | 49.6 (24.7–74.6)  | 287      | 90       | 31.4 (2.8–79.1)   | 141      | 55       | 39.0 (30.9–47.6)  | 648      | 254      | 39.2 (27.4–52.0)  |
| 40–46    | 285      | 134      | 47.0 (18.1–77.5)  | 287      | 90       | 31.4 (2.8–79.1)   | 327      | 126      | 38.5 (13.2–69.6)  | 899      | 350      | 38.9 (30.5–47.9)  |
| 40–47    | 317      | 144      | 45.4 (15.0–78.7)  | 287      | 90       | 31.4 (2.8–79.1)   | 438      | 176      | 40.2 (4.7–86.7)   | 1042     | 410      | 39.4 (31.6–47.5)  |
| 40–48    | 328      | 149      | 45.4 (15.8–77.8)  | 287      | 90       | 31.4 (2.8–79.1)   | 457      | 182      | 39.8 (6.3–83.1)   | 1072     | 421      | 39.3 (31.9–47.1)  |
| 40–49    | 330      | 149      | 45.2 (15.0–78.2)  | 287      | 90       | 31.4 (2.8–79.1)   | 465      | 185      | 39.8 (6.5–82.8)   | 1082     | 424      | 39.2 (31.8–47.0)  |
| 40–50    | 330      | 149      | 45.2 (15.0–78.2)  | 287      | 90       | 31.4 (2.8–79.1)   | 465      | 185      | 39.8 (6.5–82.8)   | 1082     | 424      | 39.2 (31.8–47.0)  |
| 40–51    | 330      | 149      | 45.2 (15.0–78.2)  | 287      | 90       | 31.4 (2.8–79.1)   | 465      | 185      | 39.8 (6.5–82.8)   | 1082     | 424      | 39.2 (31.8–47.0)  |
| 40–52    | 330      | 149      | 45.2 (15.0–78.2)  | 287      | 90       | 31.4 (2.8–79.1)   | 465      | 185      | 39.8 (6.5–82.8)   | 1082     | 424      | 39.2 (31.8–47.0)  |
| 40-01*   | 330      | 149      | 45.2 (15.0–78.2)  | 287      | 90       | 31.4 (2.8–79.1)   | 465      | 185      | 39.8 (6.5–82.8)   | 1082     | 424      | 39.2 (31.8–47.0)  |

AE, adverse event; CI, confidence interval (extended Clopper–Pearson exact CI for clustered data); ISO, International Organization for Standardization; LL, lower limit; *N*, number of participants vaccinated with GSK's inactivated quadrivalent seasonal influenza vaccine (IIV4) in the specified ISO weeks; *n*, number of participants vaccinated with GSK's IIV4 in the specified ISO weeks reporting at least one AE; UL, upper limit; % = (*n*/*N*) x 100

\* first ISO week of 2020

**Table S4 Cumulative percentages of participants reporting any AEs within 7 days post vaccination with dose 2 (Safety Set)**

| <b>Spain</b>    |                 |                 |                          |
|-----------------|-----------------|-----------------|--------------------------|
| <b>ISO week</b> | <b><i>N</i></b> | <b><i>n</i></b> | <b>% (95% CI: LL-UL)</b> |
| 40–48           | 4               | 1               | 25.0 (0.6–80.6)          |
| 40–49           | 24              | 4               | 16.7 (4.7–37.4)          |
| 40–50           | 46              | 6               | 13.0 (4.9–26.3)          |
| 40–51           | 76              | 6               | 7.9 (1.0–25.3)           |
| 40–52           | 101             | 9               | 8.9 (2.2–22.2)           |
| 40–01*          | 115             | 9               | 7.8 (1.6–21.2)           |

AE, adverse event; CI, confidence interval (extended Clopper–Pearson exact CI for clustered data); ISO, International Organization for Standardization; LL, lower limit; *N*, number of participants vaccinated with GSK's inactivated quadrivalent seasonal influenza vaccine (IIV4) in the specified ISO weeks; *n*, number of participants vaccinated with GSK's IIV4 in the specified ISO weeks reporting at least one AE; UL, upper limit; % = (*n*/*N*) x 100

\* first ISO week of 2020

**Table S5 Cumulative percentages of participants reporting any AEs post vaccination with dose 1 by age category (Safety Set)**

| ISO week                    | Belgium  |          |                   | Germany  |          |                   | Spain    |          |                   | Total    |          |                   |
|-----------------------------|----------|----------|-------------------|----------|----------|-------------------|----------|----------|-------------------|----------|----------|-------------------|
|                             | <i>N</i> | <i>n</i> | % (95% CI: LL–UL) | <i>N</i> | <i>n</i> | % (95% CI: LL–UL) | <i>N</i> | <i>n</i> | % (95% CI: LL–UL) | <i>N</i> | <i>n</i> | % (95% CI: LL–UL) |
| <b>6 months to 17 years</b> |          |          |                   |          |          |                   |          |          |                   |          |          |                   |
| 40–44                       | 0        |          |                   | 0        |          |                   | 56       | 26       | 46.4 (33.0–60.3)  | 56       | 26       | 46.4 (33.0–60.3)  |
| 40–45                       | 0        |          |                   | 0        |          |                   | 141      | 55       | 39.0 (30.9–47.6)  | 141      | 55       | 39.0 (30.9–47.6)  |
| 40–46                       | 0        |          |                   | 0        |          |                   | 253      | 95       | 37.6 (25.3–51.2)  | 253      | 95       | 37.6 (25.3–51.2)  |
| 40–47                       | 0        |          |                   | 0        |          |                   | 308      | 118      | 38.3 (19.7–59.9)  | 308      | 118      | 38.3 (19.7–59.9)  |
| 40–48                       | 0        |          |                   | 0        |          |                   | 323      | 123      | 38.1 (22.6–55.5)  | 323      | 123      | 38.1 (22.6–55.5)  |
| 40–49                       | 0        |          |                   | 0        |          |                   | 331      | 126      | 38.1 (23.0–55.1)  | 331      | 126      | 38.1 (23.0–55.1)  |
| 40–50                       | 0        |          |                   | 0        |          |                   | 331      | 126      | 38.1 (23.0–55.1)  | 331      | 126      | 38.1 (23.0–55.1)  |
| 40–51                       | 0        |          |                   | 0        |          |                   | 331      | 126      | 38.1 (23.0–55.1)  | 331      | 126      | 38.1 (23.0–55.1)  |
| 40–52                       | 0        |          |                   | 0        |          |                   | 331      | 126      | 38.1 (23.0–55.1)  | 331      | 126      | 38.1 (23.0–55.1)  |
| 40–01*                      | 0        |          |                   | 0        |          |                   | 331      | 126      | 38.1 (23.0–55.1)  | 331      | 126      | 38.1 (23.0–55.1)  |
| <b>18–65 years</b>          |          |          |                   |          |          |                   |          |          |                   |          |          |                   |
| 40–40                       | 0        |          |                   | 25       | 11       | 44.0 (0.0–100.0)  | 0        |          |                   | 25       | 11       | 44.0 (0.0–100.0)  |
| 40–41                       | 0        |          |                   | 94       | 44       | 46.8 (2.4–96.2)   | 0        |          |                   | 94       | 44       | 46.8 (2.4–96.2)   |
| 40–42                       | 112      | 61       | 54.5 (44.8–63.9)  | 115      | 52       | 45.2 (1.0–97.8)   | 0        |          |                   | 227      | 113      | 49.8 (23.8–75.8)  |
| 40–43                       | 128      | 68       | 53.1 (44.1–62.0)  | 117      | 53       | 45.3 (1.1–97.6)   | 0        |          |                   | 245      | 121      | 49.4 (25.5–73.5)  |
| 40–44                       | 130      | 69       | 53.1 (44.1–61.9)  | 117      | 53       | 45.3 (1.1–97.6)   | 0        |          |                   | 247      | 122      | 49.4 (29.2–69.7)  |
| 40–45                       | 132      | 70       | 53.0 (44.2–61.8)  | 117      | 53       | 45.3 (1.1–97.6)   | 0        |          |                   | 249      | 123      | 49.4 (31.2–67.7)  |
| 40–46                       | 136      | 72       | 52.9 (44.2–61.6)  | 117      | 53       | 45.3 (1.1–97.6)   | 74       | 31       | 41.9 (30.5–53.9)  | 327      | 156      | 47.7 (33.7–62.0)  |
| 40–47                       | 137      | 72       | 52.6 (43.9–61.1)  | 117      | 53       | 45.3 (1.1–97.6)   | 130      | 58       | 44.6 (35.9–53.6)  | 384      | 183      | 47.7 (35.8–59.8)  |
| 40–48                       | 139      | 72       | 51.8 (42.5–61.0)  | 117      | 53       | 45.3 (1.1–97.6)   | 134      | 59       | 44.0 (35.5–52.9)  | 390      | 184      | 47.2 (35.2–59.4)  |
| 40–49                       | 139      | 72       | 51.8 (42.5–61.0)  | 117      | 53       | 45.3 (1.1–97.6)   | 134      | 59       | 44.0 (35.5–52.9)  | 390      | 184      | 47.2 (35.2–59.4)  |
| 40–50                       | 139      | 72       | 51.8 (42.5–61.0)  | 117      | 53       | 45.3 (1.1–97.6)   | 134      | 59       | 44.0 (35.5–52.9)  | 390      | 184      | 47.2 (35.2–59.4)  |
| 40–51                       | 139      | 72       | 51.8 (42.5–61.0)  | 117      | 53       | 45.3 (1.1–97.6)   | 134      | 59       | 44.0 (35.5–52.9)  | 390      | 184      | 47.2 (35.2–59.4)  |

|                     |     |    |                  |     |    |                 |     |    |                  |     |     |                  |
|---------------------|-----|----|------------------|-----|----|-----------------|-----|----|------------------|-----|-----|------------------|
| 40–52               | 139 | 72 | 51.8 (42.5–61.0) | 117 | 53 | 45.3 (1.1–97.6) | 134 | 59 | 44.0 (35.5–52.9) | 390 | 184 | 47.2 (35.2–59.4) |
| 40–01*              | 139 | 72 | 51.8 (42.5–61.0) | 117 | 53 | 45.3 (1.1–97.6) | 134 | 59 | 44.0 (35.5–52.9) | 390 | 184 | 47.2 (35.2–59.4) |
| <b>&gt;65 years</b> |     |    |                  |     |    |                 |     |    |                  |     |     |                  |
| 40–40               | 0   |    |                  | 40  | 2  | 5.0 (0.0–44.1)  | 0   |    |                  | 40  | 2   | 5.0 (0.0–44.1)   |
| 40–41               | 0   |    |                  | 121 | 24 | 19.8 (0.0–89.6) | 0   |    |                  | 121 | 24  | 19.8 (0.0–89.6)  |
| 40–42               | 1   | 0  | 0.0 (0.0–97.5)   | 156 | 34 | 21.8 (0.1–84.8) | 0   |    |                  | 157 | 34  | 21.7 (1.3–67.4)  |
| 40–43               | 3   | 0  | 0.0 (0.0–70.8)   | 170 | 37 | 21.8 (0.2–80.8) | 0   |    |                  | 173 | 37  | 21.4 (3.2–56.1)  |
| 40–44               | 12  | 8  | 66.7 (0.0–100.0) | 170 | 37 | 21.8 (0.2–80.8) | 0   |    |                  | 182 | 45  | 24.7 (5.6–56.1)  |
| 40–45               | 88  | 39 | 44.3 (4.8–91.0)  | 170 | 37 | 21.8 (0.2–80.8) | 0   |    |                  | 258 | 76  | 29.5 (12.4–52.2) |
| 40–46               | 149 | 62 | 41.6 (9.0–81.1)  | 170 | 37 | 21.8 (0.2–80.8) | 0   |    |                  | 319 | 99  | 31.0 (15.7–50.2) |
| 40–47               | 180 | 72 | 40.0 (10.5–76.4) | 170 | 37 | 21.8 (0.2–80.8) | 0   |    |                  | 350 | 109 | 31.1 (17.0–48.5) |
| 40–48               | 189 | 77 | 40.7 (12.7–74.3) | 170 | 37 | 21.8 (0.2–80.8) | 0   |    |                  | 359 | 114 | 31.8 (17.6–49.0) |
| 40–49               | 191 | 77 | 40.3 (12.2–74.3) | 170 | 37 | 21.8 (0.2–80.8) | 0   |    |                  | 361 | 114 | 31.6 (17.6–48.6) |
| 40–50               | 191 | 77 | 40.3 (12.2–74.3) | 170 | 37 | 21.8 (0.2–80.8) | 0   |    |                  | 361 | 114 | 31.6 (17.6–48.6) |
| 40–51               | 191 | 77 | 40.3 (12.2–74.3) | 170 | 37 | 21.8 (0.2–80.8) | 0   |    |                  | 361 | 114 | 31.6 (17.6–48.6) |
| 40–52               | 191 | 77 | 40.3 (12.2–74.3) | 170 | 37 | 21.8 (0.2–80.8) | 0   |    |                  | 361 | 114 | 31.6 (17.6–48.6) |
| 40–01*              | 191 | 77 | 40.3 (12.2–74.3) | 170 | 37 | 21.8 (0.2–80.8) | 0   |    |                  | 361 | 114 | 31.6 (17.6–48.6) |

AE, adverse event; CI, confidence interval (extended Clopper–Pearson exact CI for clustered data); ISO, International Organization for Standardization; LL, lower limit; *N*, number of participants vaccinated with GSK's inactivated quadrivalent seasonal influenza vaccine (IIV4) in the specified ISO weeks; *n*, number of participants vaccinated with GSK's IIV4 in the specified ISO weeks reporting at least one AE; UL, upper limit; % = (*n*/*N*) x 100

\* first ISO week of 2020

**Table S6 Cumulative percentages of participants reporting any AEs within 7 days post vaccination with dose 1 by risk status<sup>a</sup> (Safety Set)**

| ISO week           | Belgium  |          |                   | Germany  |          |                   | Spain    |          |                   | Total    |          |                   |
|--------------------|----------|----------|-------------------|----------|----------|-------------------|----------|----------|-------------------|----------|----------|-------------------|
|                    | <i>N</i> | <i>n</i> | % (95% CI: LL–UL) | <i>N</i> | <i>n</i> | % (95% CI: LL–UL) | <i>N</i> | <i>n</i> | % (95% CI: LL–UL) | <i>N</i> | <i>n</i> | % (95% CI: LL–UL) |
| <b>At risk</b>     |          |          |                   |          |          |                   |          |          |                   |          |          |                   |
| 40–40              | 0        |          |                   | 23       | 2        | 8.7 (0.0–93.4)    | 0        |          |                   | 23       | 2        | 8.7 (0.0–93.4)    |
| 40–41              | 0        |          |                   | 108      | 31       | 28.7 (0.0–96.4)   | 0        |          |                   | 108      | 31       | 28.7 (0.0–96.4)   |
| 40–42              | 7        | 4        | 57.1 (18.4–90.1)  | 153      | 45       | 29.4 (0.4–89.8)   | 0        |          |                   | 160      | 49       | 30.6 (4.4–72.7)   |
| 40–43              | 11       | 5        | 45.5 (0.1–99.8)   | 168      | 48       | 28.6 (0.8–84.6)   | 0        |          |                   | 179      | 53       | 29.6 (8.5–60.3)   |
| 40–44              | 22       | 14       | 63.6 (0.0–100.0)  | 168      | 48       | 28.6 (0.8–84.6)   | 17       | 8        | 47.1 (23.0–72.2)  | 207      | 70       | 33.8 (16.2–55.5)  |
| 40–45              | 100      | 46       | 46.0 (7.4–88.9)   | 168      | 48       | 28.6 (0.8–84.6)   | 58       | 23       | 39.7 (27.1–53.4)  | 326      | 117      | 35.9 (23.4–50.0)  |
| 40–46              | 165      | 71       | 43.0 (10.9–80.4)  | 168      | 48       | 28.6 (0.8–84.6)   | 172      | 66       | 38.4 (2.6–89.3)   | 505      | 185      | 36.6 (28.3–45.6)  |
| 40–47              | 197      | 81       | 41.1 (11.4–76.7)  | 168      | 48       | 28.6 (0.8–84.6)   | 238      | 99       | 41.6 (0.3–98.5)   | 603      | 228      | 37.8 (29.4–46.8)  |
| 40–48              | 208      | 86       | 41.4 (13.0–74.8)  | 168      | 48       | 28.6 (0.8–84.6)   | 248      | 101      | 40.7 (0.4–97.9)   | 624      | 235      | 37.7 (29.7–46.1)  |
| 40–49              | 210      | 86       | 41.0 (12.5–74.8)  | 168      | 48       | 28.6 (0.8–84.6)   | 254      | 103      | 40.6 (0.3–98.0)   | 632      | 237      | 37.5 (29.6–46.0)  |
| 40–50              | 210      | 86       | 41.0 (12.5–74.8)  | 168      | 48       | 28.6 (0.8–84.6)   | 254      | 103      | 40.6 (0.3–98.0)   | 632      | 237      | 37.5 (29.6–46.0)  |
| 40–51              | 210      | 86       | 41.0 (12.5–74.8)  | 168      | 48       | 28.6 (0.8–84.6)   | 254      | 103      | 40.6 (0.3–98.0)   | 632      | 237      | 37.5 (29.6–46.0)  |
| 40–52              | 210      | 86       | 41.0 (12.5–74.8)  | 168      | 48       | 28.6 (0.8–84.6)   | 254      | 103      | 40.6 (0.3–98.0)   | 632      | 237      | 37.5 (29.6–46.0)  |
| 40–01*             | 210      | 86       | 41.0 (12.5–74.8)  | 168      | 48       | 28.6 (0.8–84.6)   | 254      | 103      | 40.6 (0.3–98.0)   | 632      | 237      | 37.5 (29.6–46.0)  |
| <b>Not at risk</b> |          |          |                   |          |          |                   |          |          |                   |          |          |                   |
| 40–40              | 0        |          |                   | 42       | 11       | 26.2 (0.0–94.2)   | 0        |          |                   | 42       | 11       | 26.2 (0.0–94.2)   |
| 40–41              | 0        |          |                   | 107      | 37       | 34.6 (5.1–77.8)   | 0        |          |                   | 107      | 37       | 34.6 (5.1–77.8)   |
| 40–42              | 106      | 57       | 53.8 (43.8–63.5)  | 118      | 41       | 34.8 (2.9–84.2)   | 0        |          |                   | 224      | 98       | 43.8 (18.9–71.1)  |
| 40–43              | 120      | 63       | 52.5 (43.2–61.7)  | 119      | 42       | 35.3 (2.8–85.2)   | 0        |          |                   | 239      | 105      | 43.9 (20.5–69.5)  |
| 40–44              | 120      | 63       | 52.5 (43.2–61.7)  | 119      | 42       | 35.3 (2.8–85.2)   | 39       | 18       | 46.2 (30.1–62.8)  | 278      | 123      | 44.2 (27.0–62.6)  |
| 40–45              | 120      | 63       | 52.5 (43.2–61.7)  | 119      | 42       | 35.3 (2.8–85.2)   | 83       | 32       | 38.6 (28.1–49.9)  | 322      | 137      | 42.6 (26.5–59.9)  |
| 40–46              | 120      | 63       | 52.5 (43.2–61.7)  | 119      | 42       | 35.3 (2.8–85.2)   | 155      | 60       | 38.7 (31.0–46.9)  | 394      | 165      | 41.9 (29.4–55.2)  |
| 40–47              | 120      | 63       | 52.5 (43.2–61.7)  | 119      | 42       | 35.3 (2.8–85.2)   | 200      | 77       | 38.5 (31.7–45.6)  | 439      | 182      | 41.5 (30.0–53.6)  |



|        |     |    |                  |     |    |                 |     |    |                  |     |     |                  |
|--------|-----|----|------------------|-----|----|-----------------|-----|----|------------------|-----|-----|------------------|
| 40–48  | 120 | 63 | 52.5 (43.2–61.7) | 119 | 42 | 35.3 (2.8–85.2) | 209 | 81 | 38.8 (32.1–45.7) | 448 | 186 | 41.5 (30.3–53.4) |
| 40–49  | 120 | 63 | 52.5 (43.2–61.7) | 119 | 42 | 35.3 (2.8–85.2) | 211 | 82 | 38.9 (32.3–45.8) | 450 | 187 | 41.6 (30.5–53.3) |
| 40–50  | 120 | 63 | 52.5 (43.2–61.7) | 119 | 42 | 35.3 (2.8–85.2) | 211 | 82 | 38.9 (32.3–45.8) | 450 | 187 | 41.6 (30.5–53.3) |
| 40–51  | 120 | 63 | 52.5 (43.2–61.7) | 119 | 42 | 35.3 (2.8–85.2) | 211 | 82 | 38.9 (32.3–45.8) | 450 | 187 | 41.6 (30.5–53.3) |
| 40–52  | 120 | 63 | 52.5 (43.2–61.7) | 119 | 42 | 35.3 (2.8–85.2) | 211 | 82 | 38.9 (32.3–45.8) | 450 | 187 | 41.6 (30.5–53.3) |
| 40–01* | 120 | 63 | 52.5 (43.2–61.7) | 119 | 42 | 35.3 (2.8–85.2) | 211 | 82 | 38.9 (32.3–45.8) | 450 | 187 | 41.6 (30.5–53.3) |

AE, adverse event; CI, confidence interval (extended Clopper–Pearson exact CI for clustered data); ISO, International Organization for Standardization; LL, lower limit; *N*, number of participants vaccinated with GSK's inactivated quadrivalent seasonal influenza vaccine (IIV4) in the specified ISO weeks; *n*, number of participants vaccinated with GSK's IIV4 in the specified ISO weeks reporting at least one AE; UL, upper limit; % = (*n*/*N*) x 100

<sup>a</sup> risk status for influenza-associated morbidity and mortality as assessed by the healthcare provider based on their judgment and experience

\* first ISO week of 2020

**Table S7 Cumulative percentages of participants reporting any AEs within 7 days post vaccination with dose 2 by risk status<sup>a</sup> (Safety Set)**

| ISO week           | Spain    |          |                   |
|--------------------|----------|----------|-------------------|
|                    | <i>N</i> | <i>n</i> | % (95% CI: LL–UL) |
| <b>At risk</b>     |          |          |                   |
| 40–48              | 1        | 0        | 0.0 (0.0–97.5)    |
| 40–49              | 9        | 1        | 11.1 (0.3–48.3)   |
| 40–50              | 16       | 2        | 12.5 (1.6–38.4)   |
| 40–51              | 27       | 2        | 7.4 (0.9–24.3)    |
| 40–52              | 43       | 5        | 11.6 (3.9–25.1)   |
| 40–01*             | 49       | 5        | 10.2 (3.4–22.2)   |
| <b>Not at risk</b> |          |          |                   |
| 40–48              | 3        | 1        | 33.3 (0.8–90.6)   |
| 40–49              | 15       | 3        | 20.0 (4.3–48.1)   |
| 40–50              | 30       | 4        | 13.3 (3.8–30.7)   |
| 40–51              | 49       | 4        | 8.2 (0.1–40.5)    |
| 40–52              | 58       | 4        | 6.9 (0.3–29.2)    |
| 40–01*             | 66       | 4        | 6.1 (0.5–22.7)    |

AE, adverse event; CI, confidence interval (extended Clopper–Pearson exact CI for clustered data); ISO, International Organization for Standardization; LL, lower limit; *N*, number of participants vaccinated with GSK's inactivated quadrivalent seasonal influenza vaccine (IIV4) in the specified ISO weeks; *n*, number of participants vaccinated with GSK's IIV4 in the specified ISO weeks reporting at least one AE; UL, upper limit; % = (*n*/*N*) x 100

<sup>a</sup> risk status for influenza-associated morbidity and mortality as assessed by the healthcare provider based on their judgment and experience

\* first ISO week of 2020

**Table S8 Participants reporting any AEs within 7 days post vaccination with dose 1 by risk status (Safety Set)**

| MedDRA<br>Primary System Organ Class (Code)                                | Belgium                    |      |      |      | Germany                    |      |     |      | Spain                      |      |      |      | Total                      |      |      |      |
|----------------------------------------------------------------------------|----------------------------|------|------|------|----------------------------|------|-----|------|----------------------------|------|------|------|----------------------------|------|------|------|
|                                                                            | <i>N</i> = 210 at risk     |      |      |      | <i>N</i> = 168 at risk     |      |     |      | <i>N</i> = 254 at risk     |      |      |      | <i>N</i> = 632 at risk     |      |      |      |
|                                                                            | <i>N</i> = 120 not at risk |      |      |      | <i>N</i> = 119 not at risk |      |     |      | <i>N</i> = 211 not at risk |      |      |      | <i>N</i> = 450 not at risk |      |      |      |
|                                                                            | 95% CI                     |      |      |      | 95% CI                     |      |     |      | 95% CI                     |      |      |      | 95% CI                     |      |      |      |
|                                                                            | <i>n</i>                   | %    | LL   | UL   | <i>n</i>                   | %    | LL  | UL   | <i>n</i>                   | %    | LL   | UL   | <i>n</i>                   | %    | LL   | UL   |
| <b>Any</b>                                                                 |                            |      |      |      |                            |      |     |      |                            |      |      |      |                            |      |      |      |
| At risk                                                                    | 86                         | 41.0 | 12.5 | 74.8 | 48                         | 28.6 | 0.8 | 84.6 | 103                        | 40.6 | 0.3  | 98.0 | 237                        | 37.5 | 29.6 | 46.0 |
| Not at risk                                                                | 63                         | 52.5 | 43.2 | 61.7 | 42                         | 35.3 | 2.8 | 85.2 | 82                         | 38.9 | 32.3 | 45.8 | 187                        | 41.6 | 30.5 | 53.3 |
| <b>Any ear and labyrinth disorders (10013993)</b>                          |                            |      |      |      |                            |      |     |      |                            |      |      |      |                            |      |      |      |
| At risk                                                                    | 1                          | 0.5  | 0.0  | 2.6  | 0                          | 0.0  | 0.0 | 2.2  | 0                          | 0.0  | 0.0  | 1.4  | 1                          | 0.2  | 0.0  | 0.9  |
| Not at risk                                                                | 0                          | 0.0  | 0.0  | 3.0  | 0                          | 0.0  | 0.0 | 3.1  | 0                          | 0.0  | 0.0  | 1.7  | 0                          | 0.0  | 0.0  | 0.8  |
| <b>Any eye disorders (10015919)</b>                                        |                            |      |      |      |                            |      |     |      |                            |      |      |      |                            |      |      |      |
| At risk                                                                    | 1                          | 0.5  | 0.0  | 15.9 | 0                          | 0.0  | 0.0 | 2.2  | 5                          | 2.0  | 0.0  | 72.2 | 6                          | 1.0  | 0.1  | 3.6  |
| Not at risk                                                                | 0                          | 0.0  | 0.0  | 3.0  | 2                          | 1.7  | 0.0 | 14.9 | 1                          | 0.5  | 0.0  | 7.4  | 3                          | 0.7  | 0.0  | 3.0  |
| <b>Any gastrointestinal disorders (10017947)</b>                           |                            |      |      |      |                            |      |     |      |                            |      |      |      |                            |      |      |      |
| At risk                                                                    | 11                         | 5.2  | 0.8  | 16.8 | 6                          | 3.6  | 0.4 | 13.2 | 20                         | 7.9  | 0.0  | 93.5 | 37                         | 5.9  | 3.1  | 10.0 |
| Not at risk                                                                | 4                          | 3.3  | 0.9  | 8.3  | 2                          | 1.7  | 0.1 | 8.6  | 14                         | 6.6  | 3.7  | 10.9 | 20                         | 4.4  | 1.9  | 8.6  |
| <b>Any general disorders and administration site conditions (10018065)</b> |                            |      |      |      |                            |      |     |      |                            |      |      |      |                            |      |      |      |
| At risk                                                                    | 60                         | 28.6 | 5.9  | 64.2 | 38                         | 22.6 | 0.8 | 73.6 | 84                         | 33.1 | 0.0  | 97.9 | 182                        | 28.8 | 21.1 | 37.6 |
| Not at risk                                                                | 59                         | 49.2 | 39.9 | 58.5 | 37                         | 31.1 | 3.3 | 77.1 | 68                         | 32.2 | 13.7 | 56.1 | 164                        | 36.4 | 24.2 | 50.2 |
| <b>Any immune system disorders (10021428)</b>                              |                            |      |      |      |                            |      |     |      |                            |      |      |      |                            |      |      |      |
| At risk                                                                    | 0                          | 0.0  | 0.0  | 1.7  | 0                          | 0.0  | 0.0 | 2.2  | 2                          | 0.8  | 0.0  | 73.1 | 2                          | 0.3  | 0.0  | 2.1  |
| Not at risk                                                                | 0                          | 0.0  | 0.0  | 3.0  | 2                          | 1.7  | 0.1 | 8.6  | 1                          | 0.5  | 0.0  | 7.4  | 3                          | 0.7  | 0.1  | 2.1  |

|                                                                       |    |      |     |      |    |     |     |      |    |      |     |      |    |     |     |      |
|-----------------------------------------------------------------------|----|------|-----|------|----|-----|-----|------|----|------|-----|------|----|-----|-----|------|
| <b>Any infections and infestations (10021881)</b>                     |    |      |     |      |    |     |     |      |    |      |     |      |    |     |     |      |
| At risk                                                               | 0  | 0.0  | 0.0 | 1.7  | 3  | 1.8 | 0.0 | 11.9 | 4  | 1.6  | 0.4 | 4.0  | 7  | 1.1 | 0.3 | 2.9  |
| Not at risk                                                           | 0  | 0.0  | 0.0 | 3.0  | 3  | 2.5 | 0.0 | 51.1 | 0  | 0.0  | 0.0 | 1.7  | 3  | 0.7 | 0.0 | 6.9  |
| <b>Any metabolism and nutrition disorders (10027433)</b>              |    |      |     |      |    |     |     |      |    |      |     |      |    |     |     |      |
| At risk                                                               | 3  | 1.4  | 0.0 | 18.2 | 0  | 0.0 | 0.0 | 2.2  | 10 | 3.9  | 1.9 | 7.1  | 13 | 2.1 | 0.6 | 5.1  |
| Not at risk                                                           | 1  | 0.8  | 0.0 | 4.6  | 1  | 0.8 | 0.0 | 7.7  | 4  | 1.9  | 0.0 | 26.9 | 6  | 1.3 | 0.4 | 3.1  |
| <b>Any musculoskeletal and connective tissue disorders (10028395)</b> |    |      |     |      |    |     |     |      |    |      |     |      |    |     |     |      |
| At risk                                                               | 21 | 10.0 | 1.6 | 29.1 | 11 | 6.6 | 3.3 | 11.4 | 17 | 6.7  | 0.0 | 97.7 | 49 | 7.8 | 4.7 | 11.8 |
| Not at risk                                                           | 16 | 13.3 | 7.8 | 20.8 | 11 | 9.2 | 0.4 | 37.4 | 8  | 3.8  | 0.0 | 72.9 | 35 | 7.8 | 2.2 | 18.7 |
| <b>Any nervous system disorders (10029205)</b>                        |    |      |     |      |    |     |     |      |    |      |     |      |    |     |     |      |
| At risk                                                               | 19 | 9.1  | 4.2 | 16.5 | 10 | 6.0 | 0.7 | 20.1 | 26 | 10.2 | 0.0 | 90.7 | 55 | 8.7 | 5.9 | 12.3 |
| Not at risk                                                           | 12 | 10.0 | 5.3 | 16.8 | 7  | 5.9 | 0.6 | 20.9 | 17 | 8.1  | 0.1 | 42.4 | 36 | 8.0 | 5.7 | 10.9 |
| <b>Any psychiatric disorders (10037175)</b>                           |    |      |     |      |    |     |     |      |    |      |     |      |    |     |     |      |
| At risk                                                               | 0  | 0.0  | 0.0 | 1.7  | 2  | 1.2 | 0.0 | 8.1  | 5  | 2.0  | 0.0 | 11.8 | 7  | 1.1 | 0.3 | 2.8  |
| Not at risk                                                           | 0  | 0.0  | 0.0 | 3.0  | 1  | 0.8 | 0.0 | 7.7  | 6  | 2.8  | 1.1 | 6.1  | 7  | 1.6 | 0.3 | 4.8  |
| <b>Any respiratory, thoracic and mediastinal disorders (10038738)</b> |    |      |     |      |    |     |     |      |    |      |     |      |    |     |     |      |
| At risk                                                               | 19 | 9.1  | 0.4 | 37.2 | 10 | 6.0 | 1.5 | 15.2 | 21 | 8.3  | 2.1 | 20.8 | 50 | 7.9 | 5.6 | 10.8 |
| Not at risk                                                           | 2  | 1.7  | 0.2 | 5.9  | 7  | 5.9 | 0.0 | 74.1 | 12 | 5.7  | 0.3 | 24.8 | 21 | 4.7 | 1.3 | 11.7 |
| <b>Any skin and subcutaneous tissue disorders (10040785)</b>          |    |      |     |      |    |     |     |      |    |      |     |      |    |     |     |      |
| At risk                                                               | 8  | 3.8  | 1.7 | 7.4  | 3  | 1.8 | 0.0 | 11.9 | 8  | 3.2  | 0.0 | 95.8 | 19 | 3.0 | 1.3 | 5.8  |
| Not at risk                                                           | 1  | 0.8  | 0.0 | 4.6  | 3  | 2.5 | 0.3 | 9.0  | 9  | 4.3  | 0.2 | 19.7 | 13 | 2.9 | 1.2 | 5.8  |

AE, adverse event; CI, confidence interval (extended Clopper–Pearson exact CI for clustered data); MedDRA, Medical Dictionary for Regulatory Activities; LL, lower limit; *N*, total number of participants; *n*, number of participants vaccinated with GSK's IIV4 reporting at least one AE; UL, upper limit; % = (*n*/*N*) x 100

**Table S9 Participants reporting any AEs within 7 days post vaccination with dose 2 by risk status (Safety Set)**

| MedDRA<br><b>Primary System Organ Class (Code)</b>                         | <b>Spain</b>                     |                          |
|----------------------------------------------------------------------------|----------------------------------|--------------------------|
|                                                                            | <i>n</i>                         | <i>% (95% CI: LL–UL)</i> |
|                                                                            | <b><i>N</i> = 49 at risk</b>     |                          |
|                                                                            | <b><i>N</i> = 66 not at risk</b> |                          |
| <b>Any</b>                                                                 |                                  |                          |
| At risk                                                                    | 5                                | 10.2 (3.4–22.2)          |
| Not at risk                                                                | 4                                | 6.1 (0.5–22.7)           |
| <b>Any general disorders and administration site conditions (10018065)</b> |                                  |                          |
| At risk                                                                    | 2                                | 4.1 (0.5–14.0)           |
| Not at risk                                                                | 3                                | 4.6 (0.4–17.3)           |
| <b>Any respiratory, thoracic, and mediastinal disorders (10038738)</b>     |                                  |                          |
| At risk                                                                    | 3                                | 6.1 (1.3–16.9)           |
| Not at risk                                                                | 1                                | 1.5 (0.0–8.2)            |
| <b>Any gastrointestinal disorders (10017947)</b>                           |                                  |                          |
| At risk                                                                    | 1                                | 2.0 (0.1–10.9)           |
| Not at risk                                                                | 1                                | 1.5 (0.0–8.2)            |
| <b>Any infections and infestations (10021881)</b>                          |                                  |                          |
| At risk                                                                    | 1                                | 2.0 (0.1–10.9)           |
| Not at risk                                                                | 1                                | 1.5 (0.0–8.2)            |

AE, adverse event; CI, confidence interval (extended Clopper–Pearson exact CI for clustered data); MedDRA, Medical Dictionary for Regulatory Activities; LL, lower limit; *N*, number of participants vaccinated with GSK's inactivated quadrivalent seasonal influenza vaccine (IIV4); *n*, number of participants vaccinated with GSK's IIV4 reporting at least one AE; UL, upper limit; % = (*n*/*N*) x 100

**Table S10 Cumulative percentages of participants in the Solicited Safety Set reporting AEs (in italics) and/or other AEs post vaccination with dose 1**

| MedDRA<br>Primary System Organ Class (Code)<br>Preferred Term (Code)   | Belgium <i>N</i> = 315 |             |            |             | Germany <i>N</i> = 279 |             |            |             | Spain <i>N</i> = 455 |             |             |             | Total <i>N</i> = 1,049 |             |             |             |
|------------------------------------------------------------------------|------------------------|-------------|------------|-------------|------------------------|-------------|------------|-------------|----------------------|-------------|-------------|-------------|------------------------|-------------|-------------|-------------|
|                                                                        | <i>n</i>               | %           | 95% CI     |             | <i>n</i>               | %           | 95% CI     |             | <i>n</i>             | %           | 95% CI      |             | <i>n</i>               | %           | 95% CI      |             |
|                                                                        |                        |             | LL         | UL          |                        |             | LL         | UL          |                      |             | LL          | UL          |                        |             | LL          | UL          |
| <b>Any</b>                                                             | <b>149</b>             | <b>47.3</b> | <b>9.8</b> | <b>87.4</b> | <b>90</b>              | <b>32.3</b> | <b>2.2</b> | <b>83.1</b> | <b>185</b>           | <b>40.7</b> | <b>2.26</b> | <b>92.4</b> | <b>424</b>             | <b>40.4</b> | <b>31.6</b> | <b>49.8</b> |
| <b>Ear and labyrinth disorders (10013993)</b>                          |                        |             |            |             |                        |             |            |             |                      |             |             |             |                        |             |             |             |
| Any                                                                    | 1                      | 0.3         | 0.0        | 3.7         | 0                      | 0.0         | 0.0        | 1.3         | 0                    | 0.0         | 0.0         | 0.8         | 1                      | 0.1         | 0.0         | 0.7         |
| Ear pain (10014020)                                                    | 1                      | 0.3         | 0.0        | 3.7         | 0                      | 0.0         | 0.0        | 1.3         | 0                    | 0.0         | 0.0         | 0.8         | 1                      | 0.1         | 0.0         | 0.7         |
| <b>Eye disorders (10015919)</b>                                        |                        |             |            |             |                        |             |            |             |                      |             |             |             |                        |             |             |             |
| Any                                                                    | 1                      | 0.3         | 0.0        | 10.1        | 2                      | 0.7         | 0.0        | 13.7        | 6                    | 1.3         | 0.0         | 63.9        | 9                      | 0.9         | 0.2         | 2.4         |
| <i>Eye allergy (10015907)</i>                                          | 1                      | 0.3         | 0.0        | 10.1        | 2                      | 0.7         | 0.0        | 13.7        | 5                    | 1.1         | 0.0         | 42.8        | 8                      | 0.8         | 0.2         | 1.9         |
| Ocular hyperaemia (10030041)                                           | 0                      | 0.0         | 0.0        | 1.2         | 0                      | 0.0         | 0.0        | 1.3         | 1                    | 0.2         | 0.0         | 46.8        | 1                      | 0.1         | 0.0         | 0.7         |
| <b>Gastrointestinal disorders (10017947)</b>                           |                        |             |            |             |                        |             |            |             |                      |             |             |             |                        |             |             |             |
| Any                                                                    | 15                     | 4.8         | 1.2        | 12.1        | 8                      | 2.9         | 0.1        | 15.4        | 34                   | 7.5         | 0.0         | 73.4        | 57                     | 5.4         | 3.3         | 8.4         |
| <i>Diarrhoea (10012735)</i>                                            | 5                      | 1.6         | 0.0        | 17.2        | 4                      | 1.4         | 0.0        | 7.9         | 16                   | 3.5         | 0.4         | 12.2        | 25                     | 2.4         | 1.2         | 4.2         |
| <i>Lip swelling (10024570)</i>                                         | 0                      | 0.0         | 0.0        | 1.2         | 0                      | 0.0         | 0.0        | 1.3         | 0                    | 0.0         | 0.0         | 0.8         | 0                      | 0.0         | 0.0         | 0.4         |
| <i>Nausea (10028813)</i>                                               | 7                      | 2.2         | 0.9        | 4.5         | 2                      | 0.7         | 0.0        | 13.7        | 12                   | 2.6         | 0.0         | 87.5        | 21                     | 2.0         | 0.8         | 4.2         |
| <i>Swollen tongue (10042727)</i>                                       | 0                      | 0.0         | 0.0        | 1.2         | 0                      | 0.0         | 0.0        | 1.3         | 0                    | 0.0         | 0.0         | 0.8         | 0                      | 0.0         | 0.0         | 0.4         |
| <i>Vomiting (10047700)</i>                                             | 4                      | 1.3         | 0.0        | 10.0        | 3                      | 1.1         | 0.0        | 14.2        | 5                    | 1.1         | 0.0         | 6.2         | 12                     | 1.1         | 0.6         | 2.0         |
| Abdominal pain upper (10000087)                                        | 1                      | 0.3         | 0.0        | 3.7         | 0                      | 0.0         | 0.0        | 1.3         | 2                    | 0.4         | 0.0         | 9.2         | 3                      | 0.3         | 0.1         | 0.8         |
| Constipation (10010774)                                                | 1                      | 0.3         | 0.0        | 3.7         | 0                      | 0.0         | 0.0        | 1.3         | 0                    | 0.0         | 0.0         | 0.8         | 1                      | 0.1         | 0.0         | 0.7         |
| Dry mouth (10013781)                                                   | 1                      | 0.3         | 0.0        | 3.7         | 1                      | 0.4         | 0.0        | 5.0         | 1                    | 0.2         | 0.0         | 46.8        | 3                      | 0.3         | 0.1         | 0.9         |
| Flatulence (10016766)                                                  | 0                      | 0.0         | 0.0        | 1.2         | 0                      | 0.0         | 0.0        | 1.3         | 1                    | 0.2         | 0.0         | 13.4        | 1                      | 0.1         | 0.0         | 0.5         |
| Frequent bowel movements (10017367)                                    | 0                      | 0.0         | 0.0        | 1.2         | 0                      | 0.0         | 0.0        | 1.3         | 1                    | 0.2         | 0.0         | 46.8        | 1                      | 0.1         | 0.0         | 0.7         |
| Lip dry (10024552)                                                     | 0                      | 0.0         | 0.0        | 1.2         | 0                      | 0.0         | 0.0        | 1.3         | 1                    | 0.2         | 0.0         | 46.8        | 1                      | 0.1         | 0.0         | 0.7         |
| Stomatitis (10042128)                                                  | 0                      | 0.0         | 0.0        | 1.2         | 0                      | 0.0         | 0.0        | 1.3         | 1                    | 0.2         | 0.0         | 13.4        | 1                      | 0.1         | 0.0         | 0.5         |
| <b>General disorders and administration site conditions (10018065)</b> |                        |             |            |             |                        |             |            |             |                      |             |             |             |                        |             |             |             |

|                                               |     |      |     |      |    |      |     |      |     |      |     |      |     |      |      |      |
|-----------------------------------------------|-----|------|-----|------|----|------|-----|------|-----|------|-----|------|-----|------|------|------|
| Any                                           | 119 | 37.8 | 1.7 | 91.2 | 75 | 26.9 | 2.9 | 70.5 | 152 | 33.4 | 0.3 | 95.0 | 346 | 33.0 | 23.7 | 43.3 |
| <i>Chills (10008531)</i>                      | 3   | 1.0  | 0.2 | 2.8  | 16 | 5.7  | 2.9 | 10.1 | 19  | 4.2  | 0.0 | 85.4 | 38  | 3.6  | 1.7  | 6.7  |
| <i>Fatigue (10016256)</i>                     | 26  | 8.3  | 0.9 | 27.9 | 17 | 6.1  | 0.3 | 25.2 | 39  | 8.6  | 0.0 | 62.5 | 82  | 7.8  | 5.5  | 10.8 |
| <i>Injection site erythema (10022061)</i>     | 8   | 2.5  | 0.2 | 10.2 | 18 | 6.5  | 1.1 | 19.4 | 31  | 6.8  | 2.5 | 14.3 | 57  | 5.4  | 3.4  | 8.3  |
| <i>Injection site pain (10022086)</i>         | 96  | 30.5 | 0.5 | 89.9 | 57 | 20.4 | 2.1 | 59.0 | 119 | 26.2 | 0.0 | 93.9 | 272 | 25.9 | 17.2 | 36.4 |
| <i>Injection site swelling (10053425)</i>     | 14  | 4.4  | 1.8 | 8.9  | 16 | 5.7  | 0.1 | 28.3 | 37  | 8.1  | 0.7 | 28.9 | 67  | 6.4  | 4.3  | 9.1  |
| <i>Fever (10037660)</i>                       | 5   | 1.6  | 0.0 | 9.7  | 3  | 1.1  | 0.0 | 6.8  | 22  | 4.8  | 1.1 | 13.3 | 30  | 2.9  | 1.3  | 5.5  |
| Asthenia (10003549)                           | 0   | 0.0  | 0.0 | 1.2  | 0  | 0.0  | 0.0 | 1.3  | 1   | 0.2  | 0.0 | 46.8 | 1   | 0.1  | 0.0  | 0.7  |
| Discomfort (10013082)                         | 0   | 0.0  | 0.0 | 1.2  | 0  | 0.0  | 0.0 | 1.3  | 2   | 0.4  | 0.0 | 25.1 | 2   | 0.2  | 0.0  | 1.0  |
| Feeling cold (10016326)                       | 1   | 0.3  | 0.0 | 3.7  | 0  | 0.0  | 0.0 | 1.3  | 0   | 0.0  | 0.0 | 0.8  | 1   | 0.1  | 0.0  | 0.7  |
| Influenza-like illness (10022004)             | 4   | 1.3  | 0.0 | 10.0 | 0  | 0.0  | 0.0 | 1.3  | 0   | 0.0  | 0.0 | 0.8  | 4   | 0.4  | 0.0  | 2.0  |
| Injection site bruising (10022052)            | 0   | 0.0  | 0.0 | 1.2  | 0  | 0.0  | 0.0 | 1.3  | 2   | 0.4  | 0.0 | 71.8 | 2   | 0.2  | 0.0  | 1.4  |
| Injection site discolouration (10051572)      | 1   | 0.3  | 0.0 | 3.7  | 0  | 0.0  | 0.0 | 1.3  | 0   | 0.0  | 0.0 | 0.8  | 1   | 0.1  | 0.0  | 0.7  |
| Injection site discomfort (10054266)          | 0   | 0.0  | 0.0 | 1.2  | 0  | 0.0  | 0.0 | 1.3  | 1   | 0.2  | 0.0 | 46.8 | 1   | 0.1  | 0.0  | 0.7  |
| injection site haematoma (10022066)           | 0   | 0.0  | 0.0 | 1.2  | 0  | 0.0  | 0.0 | 1.3  | 1   | 0.2  | 0.0 | 13.4 | 1   | 0.1  | 0.0  | 0.5  |
| Injection site induration (10022075)          | 2   | 0.6  | 0.1 | 2.3  | 0  | 0.0  | 0.0 | 1.3  | 0   | 0.0  | 0.0 | 0.8  | 2   | 0.2  | 0.0  | 0.8  |
| Injection site movement impairment (10056250) | 1   | 0.3  | 0.0 | 3.7  | 0  | 0.0  | 0.0 | 1.3  | 0   | 0.0  | 0.0 | 0.8  | 1   | 0.1  | 0.0  | 0.7  |
| Injection site pruritus (10022093)            | 2   | 0.6  | 0.0 | 7.4  | 0  | 0.0  | 0.0 | 1.3  | 0   | 0.0  | 0.0 | 0.8  | 2   | 0.2  | 0.0  | 1.4  |
| Injection site warmth (10022112)              | 0   | 0.0  | 0.0 | 1.2  | 0  | 0.0  | 0.0 | 1.3  | 1   | 0.2  | 0.0 | 13.4 | 1   | 0.1  | 0.0  | 0.5  |
| Peripheral swelling (10048959)                | 0   | 0.0  | 0.0 | 1.2  | 0  | 0.0  | 0.0 | 1.3  | 2   | 0.4  | 0.0 | 9.2  | 2   | 0.2  | 0.0  | 0.7  |
| <b>Immune system disorders (10021428)</b>     |     |      |     |      |    |      |     |      |     |      |     |      |     |      |      |      |
| Any                                           | 0   | 0.0  | 0.0 | 1.2  | 2  | 0.7  | 0.1 | 2.7  | 3   | 0.7  | 0.0 | 39.6 | 5   | 0.5  | 0.1  | 1.2  |
| <i>Hypersensitivity (10020751)</i>            | 0   | 0.0  | 0.0 | 1.2  | 2  | 0.7  | 0.1 | 2.7  | 3   | 0.7  | 0.0 | 39.6 | 5   | 0.5  | 0.1  | 1.2  |
| <b>Infections and infestations (10021881)</b> |     |      |     |      |    |      |     |      |     |      |     |      |     |      |      |      |
| Any                                           | 0   | 0.0  | 0.0 | 1.2  | 6  | 2.2  | 0.0 | 26.8 | 4   | 0.9  | 0.0 | 17.6 | 10  | 1.0  | 0.1  | 3.4  |
| Influenza (10022000)                          | 0   | 0.0  | 0.0 | 1.2  | 3  | 1.1  | 0.0 | 14.2 | 0   | 0.0  | 0.0 | 0.8  | 3   | 0.3  | 0.0  | 2.2  |
| Nasopharyngitis (10028810)                    | 0   | 0.0  | 0.0 | 1.2  | 3  | 1.1  | 0.0 | 14.2 | 2   | 0.4  | 0.0 | 71.8 | 5   | 0.5  | 0.0  | 2.1  |

|                                                                   |    |      |     |      |    |     |     |      |    |     |     |      |    |     |     |      |
|-------------------------------------------------------------------|----|------|-----|------|----|-----|-----|------|----|-----|-----|------|----|-----|-----|------|
| Pharyngitis (10034835)                                            | 0  | 0.0  | 0.0 | 1.2  | 0  | 0.0 | 0.0 | 1.3  | 1  | 0.2 | 0.0 | 13.4 | 1  | 0.1 | 0.0 | 0.5  |
| Upper respiratory tract infection (10046306)                      | 0  | 0.0  | 0.0 | 1.2  | 0  | 0.0 | 0.0 | 1.3  | 1  | 0.2 | 0.0 | 13.4 | 1  | 0.1 | 0.0 | 0.5  |
| <b>Investigations (10022891)</b>                                  |    |      |     |      |    |     |     |      |    |     |     |      |    |     |     |      |
| Any                                                               | 0  | 0.0  | 0.0 | 1.2  | 1  | 0.4 | 0.0 | 5.0  | 0  | 0.0 | 0.0 | 0.8  | 1  | 0.1 | 0.0 | 0.7  |
| Heart rate increased (10019303)                                   | 0  | 0.0  | 0.0 | 1.2  | 1  | 0.4 | 0.0 | 5.0  | 0  | 0.0 | 0.0 | 0.8  | 1  | 0.1 | 0.0 | 0.7  |
| <b>Metabolism and nutrition disorders (10027433)</b>              |    |      |     |      |    |     |     |      |    |     |     |      |    |     |     |      |
| Any                                                               | 4  | 1.3  | 0.0 | 10.0 | 1  | 0.4 | 0.0 | 7.1  | 14 | 3.1 | 0.9 | 7.4  | 19 | 1.8 | 0.7 | 3.7  |
| <i>Decreased appetite (10061428)</i>                              | 4  | 1.3  | 0.0 | 10.0 | 1  | 0.4 | 0.0 | 7.1  | 14 | 3.1 | 0.9 | 7.4  | 19 | 1.8 | 0.7 | 3.7  |
| <b>Musculoskeletal and connective tissue disorders (10028395)</b> |    |      |     |      |    |     |     |      |    |     |     |      |    |     |     |      |
| Any                                                               | 37 | 11.8 | 2.4 | 31.2 | 22 | 7.9 | 2.7 | 17.3 | 25 | 5.5 | 0.0 | 98.0 | 84 | 8.0 | 4.1 | 13.9 |
| <i>Arthralgia (10003239)</i>                                      | 10 | 3.2  | 0.1 | 17.7 | 10 | 3.6 | 0.0 | 28.1 | 17 | 3.7 | 0.0 | 93.2 | 37 | 3.5 | 1.5 | 6.9  |
| <i>Myalgia (10028411)</i>                                         | 31 | 9.8  | 2.7 | 23.5 | 14 | 5.0 | 0.1 | 29.2 | 12 | 2.6 | 0.0 | 87.5 | 57 | 5.4 | 2.1 | 11.2 |
| Muscle twitching (10028347)                                       | 0  | 0.0  | 0.0 | 1.2  | 1  | 0.4 | 0.0 | 5.0  | 0  | 0.0 | 0.0 | 0.8  | 1  | 0.1 | 0.0 | 0.7  |
| Muscular weakness (10028372)                                      | 1  | 0.3  | 0.0 | 6.2  | 0  | 0.0 | 0.0 | 1.3  | 0  | 0.0 | 0.0 | 0.8  | 1  | 0.1 | 0.0 | 0.7  |
| Musculoskeletal stiffness (10052904)                              | 1  | 0.3  | 0.0 | 6.2  | 0  | 0.0 | 0.0 | 1.3  | 0  | 0.0 | 0.0 | 0.8  | 1  | 0.1 | 0.0 | 0.7  |
| <b>Nervous system disorders (10029205)</b>                        |    |      |     |      |    |     |     |      |    |     |     |      |    |     |     |      |
| Any                                                               | 31 | 9.8  | 4.1 | 19.2 | 17 | 6.1 | 0.7 | 21.1 | 43 | 9.5 | 0.0 | 88.0 | 91 | 8.7 | 6.0 | 12.0 |
| <i>Dizziness (10013573)</i>                                       | 10 | 3.2  | 1.5 | 5.8  | 6  | 2.2 | 0.0 | 15.7 | 9  | 2.0 | 0.0 | 52.0 | 25 | 2.4 | 1.4 | 3.9  |
| <i>Headache (10019211)</i>                                        | 23 | 7.3  | 0.8 | 25.0 | 14 | 5.0 | 0.5 | 18.2 | 37 | 8.1 | 0.0 | 82.6 | 74 | 7.1 | 4.6 | 10.3 |
| Dysgeusia (10013911)                                              | 0  | 0.0  | 0.0 | 1.2  | 1  | 0.4 | 0.0 | 5.0  | 0  | 0.0 | 0.0 | 0.8  | 1  | 0.1 | 0.0 | 0.7  |
| Hypersomnia (10020765)                                            | 0  | 0.0  | 0.0 | 1.2  | 0  | 0.0 | 0.0 | 1.3  | 1  | 0.2 | 0.0 | 46.8 | 1  | 0.1 | 0.0 | 0.7  |
| Poor quality sleep (10062519)                                     | 1  | 0.3  | 0.0 | 3.7  | 0  | 0.0 | 0.0 | 1.3  | 0  | 0.0 | 0.0 | 0.8  | 1  | 0.1 | 0.0 | 0.7  |
| Psychomotor hyperactivity (10037211)                              | 0  | 0.0  | 0.0 | 1.2  | 0  | 0.0 | 0.0 | 1.3  | 1  | 0.2 | 0.0 | 13.4 | 1  | 0.1 | 0.0 | 0.5  |
| Sensory disturbance (10040026)                                    | 1  | 0.3  | 0.0 | 3.7  | 0  | 0.0 | 0.0 | 1.3  | 0  | 0.0 | 0.0 | 0.8  | 1  | 0.1 | 0.0 | 0.7  |
| Somnolence (10041349)                                             | 0  | 0.0  | 0.0 | 1.2  | 0  | 0.0 | 0.0 | 1.3  | 1  | 0.2 | 0.0 | 13.4 | 1  | 0.1 | 0.0 | 0.5  |
| <b>Psychiatric disorders (10037175)</b>                           |    |      |     |      |    |     |     |      |    |     |     |      |    |     |     |      |
| Any                                                               | 0  | 0.0  | 0.0 | 1.2  | 3  | 1.1 | 0.1 | 4.5  | 11 | 2.4 | 0.4 | 7.5  | 14 | 1.3 | 0.4 | 3.1  |
| <i>Irritability (10022998)</i>                                    | 0  | 0.0  | 0.0 | 1.2  | 2  | 0.7 | 0.1 | 2.7  | 11 | 2.4 | 0.4 | 7.5  | 13 | 1.2 | 0.3 | 3.2  |



|                                                                   |    |     |     |      |    |     |     |      |    |     |     |      |    |     |     |      |
|-------------------------------------------------------------------|----|-----|-----|------|----|-----|-----|------|----|-----|-----|------|----|-----|-----|------|
| Restlessness (10038743)                                           | 0  | 0.0 | 0.0 | 1.2  | 1  | 0.4 | 0.0 | 5.0  | 0  | 0.0 | 0.0 | 0.8  | 1  | 0.1 | 0.0 | 0.7  |
| <b>Respiratory, thoracic and mediastinal disorders (10038738)</b> |    |     |     |      |    |     |     |      |    |     |     |      |    |     |     |      |
| Any                                                               | 21 | 6.7 | 0.1 | 33.8 | 17 | 6.1 | 0.0 | 38.9 | 33 | 7.3 | 1.5 | 19.7 | 71 | 6.8 | 4.3 | 10.1 |
| <i>Rhinorrhoea (10039101)</i>                                     | 18 | 5.7 | 0.0 | 36.4 | 11 | 3.9 | 0.1 | 23.0 | 30 | 6.6 | 1.2 | 19.1 | 59 | 5.6 | 3.4 | 8.6  |
| Cough (10011224)                                                  | 2  | 0.6 | 0.0 | 5.9  | 4  | 1.4 | 0.0 | 18.0 | 4  | 0.9 | 0.0 | 17.6 | 10 | 1.0 | 0.4 | 2.1  |
| Dysphonia (10013952)                                              | 1  | 0.3 | 0.0 | 3.7  | 1  | 0.4 | 0.0 | 5.0  | 0  | 0.0 | 0.0 | 0.8  | 2  | 0.2 | 0.0 | 0.8  |
| Dyspnoea (10013968)                                               | 1  | 0.3 | 0.0 | 10.1 | 0  | 0.0 | 0.0 | 1.3  | 0  | 0.0 | 0.0 | 0.8  | 1  | 0.1 | 0.0 | 0.8  |
| Epistaxis (10015090)                                              | 1  | 0.3 | 0.0 | 3.7  | 0  | 0.0 | 0.0 | 1.3  | 0  | 0.0 | 0.0 | 0.8  | 1  | 0.1 | 0.0 | 0.7  |
| Increased upper airway secretion (10062717)                       | 0  | 0.0 | 0.0 | 1.2  | 0  | 0.0 | 0.0 | 1.3  | 1  | 0.2 | 0.0 | 13.4 | 1  | 0.1 | 0.0 | 0.5  |
| Oropharyngeal pain (10068319)                                     | 1  | 0.3 | 0.0 | 6.2  | 5  | 1.8 | 0.0 | 13.8 | 1  | 0.2 | 0.0 | 13.4 | 7  | 0.7 | 0.1 | 2.3  |
| Sneezing (10041232)                                               | 0  | 0.0 | 0.0 | 1.2  | 1  | 0.4 | 0.0 | 5.0  | 1  | 0.2 | 0.0 | 13.4 | 2  | 0.2 | 0.0 | 0.7  |
| Tonsillar inflammation (10065169)                                 | 0  | 0.0 | 0.0 | 1.2  | 0  | 0.0 | 0.0 | 1.3  | 1  | 0.2 | 0.0 | 46.8 | 1  | 0.1 | 0.0 | 0.7  |
| <b>Skin and subcutaneous tissue disorders (10040785)</b>          |    |     |     |      |    |     |     |      |    |     |     |      |    |     |     |      |
| Any                                                               | 9  | 2.9 | 0.1 | 14.6 | 6  | 2.2 | 0.2 | 9.0  | 17 | 3.7 | 0.0 | 68.0 | 32 | 3.1 | 1.8 | 4.9  |
| <i>Pruritus (10037087)</i>                                        | 7  | 2.2 | 0.0 | 17.6 | 4  | 1.4 | 0.2 | 5.4  | 12 | 2.6 | 0.0 | 45.0 | 23 | 2.2 | 1.2 | 3.7  |
| <i>Rash (10037844)</i>                                            | 3  | 1.0 | 0.2 | 2.8  | 0  | 0.0 | 0.0 | 1.3  | 3  | 0.7 | 0.0 | 39.6 | 6  | 0.6 | 0.2 | 1.3  |
| <i>Swelling face (10042682)</i>                                   | 0  | 0.0 | 0.0 | 1.2  | 0  | 0.0 | 0.0 | 1.3  | 0  | 0.0 | 0.0 | 0.8  | 0  | 0.0 | 0.0 | 0.4  |
| Erythema (10015150)                                               | 0  | 0.0 | 0.0 | 1.2  | 0  | 0.0 | 0.0 | 1.3  | 2  | 0.4 | 0.0 | 9.2  | 2  | 0.2 | 0.0 | 0.7  |
| Night sweats (10029410)                                           | 0  | 0.0 | 0.0 | 1.2  | 1  | 0.4 | 0.0 | 5.0  | 0  | 0.0 | 0.0 | 0.8  | 1  | 0.1 | 0.0 | 0.7  |
| Rash macular (10037867)                                           | 0  | 0.0 | 0.0 | 1.2  | 1  | 0.4 | 0.0 | 5.0  | 0  | 0.0 | 0.0 | 0.8  | 1  | 0.1 | 0.0 | 0.7  |
| <b>Vascular disorders (10047065)</b>                              |    |     |     |      |    |     |     |      |    |     |     |      |    |     |     |      |
| Any                                                               | 2  | 0.6 | 0.1 | 2.3  | 0  | 0.0 | 0.0 | 1.3  | 0  | 0.0 | 0.0 | 0.8  | 2  | 0.2 | 0.0 | 0.8  |
| Hot flush (10060800)                                              | 1  | 0.3 | 0.0 | 6.2  | 0  | 0.0 | 0.0 | 1.3  | 0  | 0.0 | 0.0 | 0.8  | 1  | 0.1 | 0.0 | 0.7  |
| Hypertension (10020772)                                           | 1  | 0.3 | 0.0 | 3.7  | 0  | 0.0 | 0.0 | 1.3  | 0  | 0.0 | 0.0 | 0.8  | 1  | 0.1 | 0.0 | 0.7  |

Bold values represent the MedDRA Primary System Organ Class. Terms in italics represent Preferred Terms which correspond to the predefined AEs

AEs, adverse events; AEIs, adverse events of interest; CI, confidence interval (extended Clopper–Pearson exact CI for clustered data); MedDRA, Medical Dictionary for Regulatory Activities; LL, lower limit; *N*, number of participants vaccinated with GSK's inactivated quadrivalent seasonal influenza vaccine (IIV4); *n*, number of participants vaccinated with GSK's IIV4 reporting at least one AE; UL, upper limit; % = (n/N) x 100
